# Supplementary material
Source: PubMed Central journal article supplement (PMC2944614)
Supplement: supp_54_10_4208__1.pdf [file supp_54_10_4208__1.pdf]

TABLE 2: Changes in gene expression upon treatment with 0.12 mM AgNO<sub>3</sub>

| ORF and functional category      | Gene   | Annotation                                                 | Fold change |         |
|----------------------------------|--------|------------------------------------------------------------|-------------|---------|
|                                  |        |                                                            | 30 min      | 90 min  |
| <b>Respiratory Chain</b>         |        |                                                            |             |         |
| SERP0672                         | cydA   | cytochrome d ubiquinol oxidase, subunit I                  | 2.10        | 2.24    |
| SERP0673                         | cydB   | cytochrome d ubiquinol oxidase, subunit II                 | 6.54        | 4.72    |
| SERP0644                         | qoxC   | quinol oxidase, subunit III                                | -           | 2.03    |
| SERP0643                         | qoxD   | quinol oxidase, subunit IV                                 | 4.07        | 4.95    |
| SERP1708                         | atpC   | ATP synthase F1, epsilon subunit                           | 2.04        | 2.81    |
| SERP1709                         | atpD   | F0F1 ATP synthase subunit beta                             | -           | 2.65    |
| SERP1710                         | atpG   | F0F1 ATP synthase subunit gamma                            | -           | 2.02    |
| SERP0084                         | nuoF   | NADH dehydrogenase subunit 5                               | -           | 2.45    |
| SERP0731                         | sdhA   | succinate dehydrogenase flavoprotein subunit               | -           | -3.29   |
| SERP0732                         | sdhB   | succinate dehydrogenase iron-sulfur subunit                | 2.73        | -2.22   |
| SERP0730                         | sdhC   | succinate dehydrogenase, cytochrome b558 subunit           | -6.32       | -43.87  |
| <b>Glycolysis</b>                |        |                                                            |             |         |
| SERP1494                         | -      | fructokinase, putative                                     | 2.81        | 5.56    |
| SERP0358                         | fruK   | 1-phosphofructokinase                                      | -           | 8.09    |
| SERP1261                         | pyk    | pyruvate kinase                                            | -           | 3.21    |
| SERP0680                         | pdhA   | pyruvate dehydrogenase complex E1 component, alpha subunit | -           | -2.26   |
| SERP0442                         | gapA-1 | glyceraldehyde 3-phosphate dehydrogenase 1                 | -           | 2.48    |
| SERP1250                         | gapA-2 | glyceraldehyde 3-phosphate dehydrogenase 2                 | -7.05       | -101.20 |
| SERP2087                         | -      | D-lactate dehydrogenase                                    | -2.44       | -2.53   |
| <b>TCA cycle</b>                 |        |                                                            |             |         |
| SERP1258                         | gltA   | citrate synthase                                           | -           | -2.34   |
| SERP1387                         | fumC   | fumarate hydratase                                         | -           | -3.46   |
| SERP0921                         | acnA   | aconitate hydratase                                        | -           | -3.86   |
| SERP0985                         | sucB   | dihydrolipoamide acetyltransferase                         | -           | -4.30   |
| SERP0813                         | sucC   | succinyl-CoA synthetase subunit beta                       | -           | -4.88   |
| <b>Iron homeostasis</b>          |        |                                                            |             |         |
| SERP1120                         | fur    | transcriptional regulator, Fur family                      | 7.87        | 9.69    |
| SERP0522                         | -      | NifU domain protein                                        | 11.82       | 3.19    |
| SERP0499                         | -      | NifU domain protein                                        | 2.20        | 2.75    |
| SERP1431                         | ftnA   | ferritin family protein                                    | 2.25        | 2.22    |
| SERP1366                         | hemG   | protoporphyrinogen oxidase                                 | 2.71        | 4.44    |
| SERP1231                         | hemL-1 | glutamate-1-semialdehyde aminotransferase                  | 2.10        | 2.57    |
| SERP1368                         | hemE   | uroporphyrinogen decarboxylase                             | -2.61       | -       |
| SERP2189                         | -      | uroporphyrin-III C-methyltransferase, putative             | -           | 4.47    |
| SERP2188                         | -      | precorrin-2 dehydrogenase                                  | -           | 2.22    |
| SERP2127                         | feoA   | FeoA family protein                                        | -6.45       | -4.15   |
| SERP2126                         | feoB   | ferrous iron transport protein B                           | -6.85       | -6.18   |
| SERP0292                         | sitA   | Possible iron transporter                                  | -42.56      | -72.04  |
| SERP0291                         | sitB   | Possible iron transporter                                  | -10.92      | -14.28  |
| SERP0290                         | sitC   | Possible iron transporter                                  | -12.44      | -16.47  |
| SERP0293                         | sirR   | iron-dependent repressor                                   | -6.68       | -6.45   |
| <b>Oxidative stress response</b> |        |                                                            |             |         |
| SERP2194                         | gpxA-2 | glutathione peroxidase                                     | 3.95        | 4.26    |
| SERP0500                         | sufB   | FeS assembly protein SufB                                  | 3.30        | 3.84    |
| SERP0151                         | hsI0   | chaperonin, 33 kDa                                         | 3.24        | -       |
| SERP0728                         | trxA   | thioredoxin                                                | 2.09        | 2.48    |
| SERP0432                         | trxB   | thioredoxin-disulfide reductase                            | 2.66        | 2.71    |
| SERP0059                         | ahpF   | alkyl hydroperoxide reductase, F subunit                   | 2.52        | 2.52    |
| SERP0060                         | ahpC   | alkyl hydroperoxide reductase, C subunit                   | 2.27        | 2.26    |
| SERP2265                         | -      | organic hydroperoxide resistance protein, putative         | -           | 4.48    |

TABLE 2: Changes in gene expression upon treatment with 0.12 mM AgNO<sub>3</sub>

| ORF and functional category        | Gene   | Annotation                                                        | Fold change |        |
|------------------------------------|--------|-------------------------------------------------------------------|-------------|--------|
|                                    |        |                                                                   | 30 min      | 90 min |
| <b>Cell Wall / Biofilm</b>         |        |                                                                   |             |        |
| SERP0518                           | dltA   | D-alanine--D-alanyl carrier protein ligase                        | 2.60        | 7.82   |
| SERP0519                           | dltB   | dltB protein                                                      | 2.88        | 11.64  |
| SERP0520                           | dltC   | D-alanine--poly(phosphoribitol) ligase subunit 2                  | 2.54        | 9.68   |
| SERP0521                           | dltD   | dltD protein                                                      | 4.78        | 18.31  |
| SERP2293                           | icaA   | N-glycosyltransferase PgaC                                        | 2.36        | 8.85   |
| SERP2295                           | icaB   | intercellular adhesion protein B                                  | 2.51        | 8.23   |
| SERP2296                           | icaC   | intercellular adhesion protein C                                  | 3.29        | 9.74   |
| SERP2294                           | icaD   | intercellular adhesion protein D                                  | 2.10        | 8.24   |
| SERP2292                           | icaR   | intercellular adhesion regulator                                  | -2.61       | -9.37  |
| SERP1731                           | murA2  | UDP-N-acetylglucosamine 1-carboxyvinyltransferase                 | -3.02       | -5.33  |
| SERP0405                           | murB   | UDP-N-acetylenolpyruvoylglucosamine reductase                     | -3.62       | -4.21  |
| SERP0993                           | murG   | N-acetylglucosaminyl transferase                                  | -4.00       | -2.38  |
| SERP0607                           | murE   | UDP-N-acetylmuramoylalanyl-D-glutamate-2,6-diaminopimelate ligase | -6.25       | -2.97  |
| SERP0746                           | pbp1   | penicillin-binding protein 1                                      | -10.59      | -9.71  |
| SERP1117                           | pbp3   | penicillin-binding protein 3                                      | -13.49      | -9.36  |
| SERP0747                           | mraY   | phospho-N-acetylmuramoyl-pentapeptide-transferase                 | -5.17       | -6.41  |
| SERP2533                           | yycG   | sensory box histidine kinase YycG                                 | -5.18       | -8.32  |
| SERP1844                           | femX   | femX protein                                                      | -5.89       | -8.31  |
| SERP0946                           | femA   | femA protein                                                      | -7.34       | -6.55  |
| SERP0827                           | uppS   | undecaprenyl diphosphate synthase                                 | -12.36      | -7.17  |
| SERP2024                           | lytS   | sensor histidine kinase LytS                                      | -2.43       | -2.81  |
| SERP2025                           | lytR   | response regulator LytR                                           | -9.01       | -6.23  |
| SERP2027                           | lrgB   | antiholin-like protein LrgB                                       | -2.97       | -26.02 |
| SERP2026                           | lrgA   | murein hydrolase regulator LrgA                                   | -3.86       | -71.30 |
| <b>DNA repair / protection</b>     |        |                                                                   |             |        |
| SERP0166                           | radA   | DNA repair protein RadA                                           | 7.44        | 13.26  |
| SERP0935                           | -      | ImpB/MucB/SamB family protein                                     | 4.43        | 4.94   |
| SERP1442                           | ligA   | DNA ligase, NAD-dependent                                         | 2.14        | 2.39   |
| SERP0727                           | mutS2  | recombination and DNA strand exchange inhibitor protein           | 3.29        | 5.01   |
| SERP0427                           | uvrA   | excinuclease ABC, A subunit                                       | 2.84        | 3.15   |
| SERP0426                           | uvrB   | excinuclease ABC subunit B                                        | -3.12       | -3.22  |
| SERP0729                           | uvrC   | excinuclease ABC subunit C                                        | 3.26        | 2.65   |
| SERP1041                           | hup    | DNA-binding protein HU                                            | 3.26        | 3.97   |
| SERP0045                           | ssb    | single-stranded DNA-binding protein                               | 2.20        | 2.69   |
| SERP1199                           | recJ   | single-stranded-DNA-specific exonuclease RecJ                     | -4.82       | -2.73  |
| SERP0793                           | recG   | ATP-dependent DNA helicase RecG                                   | -3.45       | -7.73  |
| SERP1080                           | recN   | DNA repair protein RecN                                           | 2.72        | 2.41   |
| SERP1019                           | recU   | Holliday junction-specific endonuclease                           | -4.09       | -2.01  |
| SERP1411                           | recX   | recombination regulator RecX                                      | -28.52      | -21.39 |
| SERP0555                           | rexA   | exonuclease RexA                                                  | -2.48       | -2.30  |
| SERP0141                           | mfd    | transcription-repair coupling factor                              | -2.48       | -      |
| SERP0909                           | lexA   | LexA repressor                                                    | -3.69       | -5.22  |
| SERP1253                           | fpg    | formamidopyrimidine-DNA glycosylase                               | -8.58       | -7.50  |
| SERP1660                           | -      | MutS family protein                                               | -53.21      | -19.13 |
| <b>Replication / Cell division</b> |        |                                                                   |             |        |
| SERP0124                           | -      | DNA replication initiation control protein YabA                   | 3.86        | 7.24   |
| SERP2553                           | dnaA   | chromosomal replication initiation protein                        | -7.77       | -3.68  |
| SERP2537                           | dnaB   | replicative DNA helicase                                          | -           | 2.30   |
| SERP1266                           | dnaE   | DNA polymerase III, alpha subunit                                 | -10.23      | -8.24  |
| SERP2552                           | dnaN   | DNA polymerase III subunit beta                                   | -2.10       | -3.24  |
| SERP2548                           | gyrA   | DNA gyrase, A subunit                                             | -3.17       | -3.01  |
| SERP2549                           | gyrB   | DNA gyrase, B subunit                                             | -8.04       | -5.75  |
| SERP1060                           | xerD   | tyrosine recombinase XerD                                         | -3.35       | -6.23  |
| SERP2550                           | recF   | recombination protein F                                           | -8.27       | -7.08  |
| SERP1049                           | recQ-2 | ATP-dependent DNA helicase RecQ                                   | -15.21      | -29.34 |
| SERP1254                           | polA   | DNA polymerase I                                                  | -7.88       | -6.30  |

TABLE 2: Changes in gene expression upon treatment with 0.12 mM AgNO<sub>3</sub>

| ORF and functional category  | Gene  | Annotation                                                      | Fold change |        |
|------------------------------|-------|-----------------------------------------------------------------|-------------|--------|
|                              |       |                                                                 | 30 min      | 90 min |
| SERP0925                     | parE  | DNA topoisomerase IV subunit B                                  | -3.85       | -2.20  |
| SERP1025                     | -     | DNA polymerase III, epsilon subunit/ATP-dependent helicase DinG | -11.20      | -12.48 |
| SERP0917                     | sbcD  | exonuclease SbcD                                                | -12.34      | -8.74  |
| SERP0745                     | ftsL  | cell division protein FtsL                                      | -11.13      | -10.02 |
| SERP1691                     | -     | cell division protein, FtsW/RodA/SpoVE family                   | -19.75      | -15.45 |
| SERP1058                     | scpA  | segregation and condensation protein A                          | -21.30      | -8.82  |
| SERP1057                     | scpB  | segregation and condensation protein B                          | -38.19      | -14.97 |
| <b>Ribosome constituents</b> |       |                                                                 |             |        |
| SERP1825                     | rpsC  | 30S ribosomal protein S3                                        | 2.65        | 3.48   |
| SERP1814                     | rpsE  | 30S ribosomal protein S5                                        | 2.37        | 2.64   |
| SERP0044                     | rpsF  | 30S ribosomal protein S6                                        | 2.27        | 2.86   |
| SERP0187                     | rpsG  | 30S ribosomal protein S7                                        | 2.75        | 2.75   |
| SERP1817                     | rpsH  | 30S ribosomal protein S8                                        | 2.52        | 3.71   |
| SERP1806                     | rpsK  | 30S ribosomal protein S11                                       | 2.16        | 2.64   |
| SERP0186                     | rpsL  | 30S ribosomal protein S12                                       | 2.09        | 2.47   |
| SERP1807                     | rpsM  | 30S ribosomal protein S13                                       | 2.37        | 2.74   |
| SERP0905                     | rpsN  | 30S ribosomal protein S14                                       | 34.76       | 13.11  |
| SERP0804                     | rpsP  | 30S ribosomal protein S16                                       | 3.53        | 4.67   |
| SERP0046                     | rpsR  | 30S ribosomal protein S18                                       | 4.61        | 6.00   |
| SERP1827                     | rpsS  | 30S ribosomal protein S19                                       | 2.12        | 2.34   |
| SERP1153                     | rpsT  | 30S ribosomal protein S20                                       | 3.91        | 7.50   |
| SERP0179                     | rplA  | 50S ribosomal protein L1                                        | 4.09        | 5.48   |
| SERP1828                     | rplB  | 50S ribosomal protein L2                                        | 2.07        | 2.26   |
| SERP1819                     | rplE  | 50S ribosomal protein L5                                        | 2.35        | 3.16   |
| SERP1816                     | rplF  | 50S ribosomal protein L6                                        | 2.36        | 3.16   |
| SERP0178                     | rplK  | 50S ribosomal protein L11                                       | 2.81        | 2.61   |
| SERP0181                     | rplL  | 50S ribosomal protein L7/L12                                    | 2.05        | 3.48   |
| SERP1812                     | rplO  | 50S ribosomal protein L15                                       | 3.18        | 5.05   |
| SERP1824                     | rplP  | 50S ribosomal protein L16                                       | 2.05        | 2.65   |
| SERP1804                     | rplQ  | 50S ribosomal protein L17                                       | 2.44        | 2.63   |
| SERP1815                     | rplR  | 50S ribosomal protein L18                                       | 2.36        | 3.53   |
| SERP0807                     | rplS  | 50S ribosomal protein L19                                       | 7.12        | 4.91   |
| SERP1242                     | rplT  | 50S ribosomal protein L20                                       | 3.38        | 4.19   |
| SERP1826                     | rplV  | 50S ribosomal protein L22                                       | 2.95        | 4.16   |
| SERP1820                     | rplX  | 50S ribosomal protein L24                                       | 2.30        | 4.10   |
| SERP1146                     | prmA  | ribosomal protein L11 methyltransferase                         | 12.38       | 9.70   |
| SERP0790                     | rpmB  | 50S ribosomal protein L28                                       | 2.84        | 2.76   |
| SERP1823                     | rpmC  | 50S ribosomal protein L29                                       | 2.15        | 3.19   |
| SERP1813                     | rpmD  | 50S ribosomal protein L30                                       | 2.21        | 2.21   |
| SERP1727                     | rpmE2 | 50S ribosomal protein L31 type B                                | 2.21        | 2.31   |
| SERP1116                     | rpmG  | 50S ribosomal protein L33                                       | 9.82        | 16.19  |
| SERP1243                     | rpmI  | 50S ribosomal protein L35                                       | 2.71        | 3.59   |
| <b>Amino acid synthesis</b>  |       |                                                                 |             |        |
| SERP1673                     | ilvA  | threonine dehydratase                                           | 14.56       | 17.94  |
| SERP1666                     | ilvB  | acetolactate synthase, large subunit, biosynthetic type         | 32.88       | 17.12  |
| SERP1668                     | ilvC  | ketol-acid reductoisomerase                                     | 46.56       | 31.07  |
| SERP1665                     | ilvD  | dihydroxy-acid dehydratase                                      | 12.69       | 6.79   |
| SERP1669                     | leuA  | 2-isopropylmalate synthase                                      | 37.70       | 18.91  |
| SERP1670                     | leuB  | 3-isopropylmalate dehydrogenase                                 | 23.99       | 10.51  |
| SERP1671                     | leuC  | isopropylmalate isomerase large subunit                         | 5.41        | 2.67   |
| SERP1672                     | leuD  | 3-isopropylmalate dehydratase, small subunit                    | 12.02       | 10.07  |
| SERP2185                     | cysC  | adenylsulfate kinase                                            | 2.50        | 10.92  |
| SERP0169                     | cysE  | serine acetyltransferase                                        | 2.37        | 2.54   |
| SERP2190                     | cysI  | sulfite reductase (NADPH) hemoprotein beta-component            | 2.73        | 6.99   |
| SERP2191                     | cysJ  | sulfite reductase (NADPH) flavoprotein alpha-component          | 2.39        | 6.61   |
| SERP2222                     | cadC  | transcriptional regulator CadC                                  | 32.54       | 60.73  |

TABLE 2: Changes in gene expression upon treatment with 0.12 mM AgNO<sub>3</sub>

| ORF and functional category   | Gene  | Annotation                                           | Fold change |        |
|-------------------------------|-------|------------------------------------------------------|-------------|--------|
|                               |       |                                                      | 30 min      | 90 min |
| SERP0938                      | trpG  | anthranilate synthase component II                   | 11.00       | 4.71   |
| SERP0939                      | trpD  | anthranilate phosphoribosyltransferase               | 5.51        | 3.76   |
| SERP1667                      | -     | acetolactate synthase, small subunit, truncation     | 78.15       | 35.85  |
| SERP0109                      | gltD  | glutamate synthase subunit beta                      | 2.67        | 4.72   |
| <b>Chaperones / Proteases</b> |       |                                                      |             |        |
| SERP0564                      | clpB  | ATP-dependent Clp protease, ATP-binding subunit ClpB | 7.03        | 4.37   |
| SERP0165                      | clpC  | ATP-dependent Clp protease, ATP-binding subunit ClpC | 4.31        | 3.11   |
| SERP0436                      | clpP  | ATP-dependent Clp protease, proteolytic subunit ClpP | 6.99        | 6.12   |
| SERP1238                      | clpX  | ATP-dependent protease ATP-binding subunit           | 2.67        | 3.38   |
| SERP1484                      | groEL | chaperonin GroEL                                     | 4.46        | 4.14   |
| SERP1485                      | groES | co-chaperonin GroES                                  | 3.02        | 3.49   |
| SERP1149                      | grpE  | heat shock protein GrpE                              | 2.83        | -      |
| SERP1147                      | dnaJ  | dnaJ protein                                         | 3.69        | 3.18   |
| SERP1148                      | dnaK  | dnaK protein                                         | 2.57        | 2.03   |
| SERP0820                      | hslU  | ATP-dependent protease ATP-binding subunit           | 2.28        | 2.83   |
| SERP0819                      | hslV  | ATP-dependent protease peptidase subunit             | 2.44        | 3.04   |
| SERP0162                      | ctsR  | transcriptional regulator CtsR                       | 7.40        | 5.07   |
| <b>Global regulators</b>      |       |                                                      |             |        |
| SERP1493                      | agrA  | accessory gene regulator protein A                   | -10.61      | -9.30  |
| SERP1492                      | agrC  | accessory gene regulator protein C                   | -7.49       | -7.13  |
| SERP1680                      | rsbU  | sigma factor B regulator protein                     | -15.23      | -9.55  |
| SERP1679                      | rsbV  | anti-anti-sigma factor RsbV                          | -14.37      | -12.57 |
| SERP1678                      | rsbW  | serine-protein kinase RsbW                           | -4.86       | -5.90  |
| SERP1657                      | rex   | redox-sensing transcriptional repressor Rex          | -32.71      | -22.76 |
| <b>Resistance proteins</b>    |       |                                                      |             |        |
| SERP2221                      | -     | cadmium resistance family protein                    | 30.25       | 69.44  |
| SERP2132                      | copZ  | copper resistance family protein                     | 4.37        | 6.46   |
| SERP0353                      | norA  | quinolone resistance protein NorA                    | 2.82        | 4.12   |
| SERP1110                      | -     | metallo-beta-lactamase family protein                | -11.26      | -9.55  |
| SERP2019                      | -     | fmtA-like protein                                    | -13.03      | -9.91  |
| SERP2349                      | fosB  | fosfomycin resistance protein FosB                   | -13.20      | -7.94  |
